# Supplementary material
Source: Research Square preprint supplement (doi:10.21203/rs.3.rs-10006391/v1)
Supplement: Supplementary file 2 [file 3a2284090bbcd743878141eb.docx]

**Supplementary Material**

Contents

[Figure S1: Spaghetti plot of lactate values at baseline, in the window around 8 hours and 24 hours (restricted to children in primary analysis) 2](#_Toc232068087)

[Figure S2: Trial schema 3](#_Toc232068088)

[Table S1: Baseline characteristics of all children enrolled. 4](#_Toc232068089)

[Table S2: Decisions made by the Data Monitoring Committee 5](#_Toc232068090)

[Table S3: Outcomes in all children enrolled 6](#_Toc232068091)

[Table S4: FEAST Paediatric Emergency Triage (PET) score in primary analysis population (n=20) 7](#_Toc232068092)

[Table S5: Schedule of Assessments 8](#_Toc232068093)

## Figure S1: Spaghetti plot of lactate values at baseline, in the window around 8 hours and 24 hours (restricted to children in primary analysis)


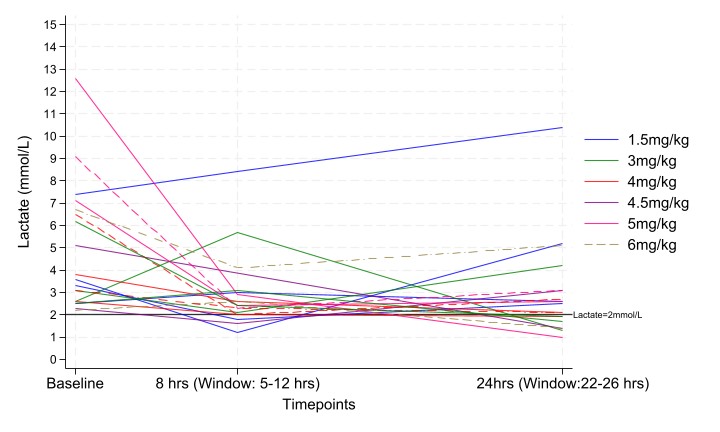


## Figure S2: Trial schema


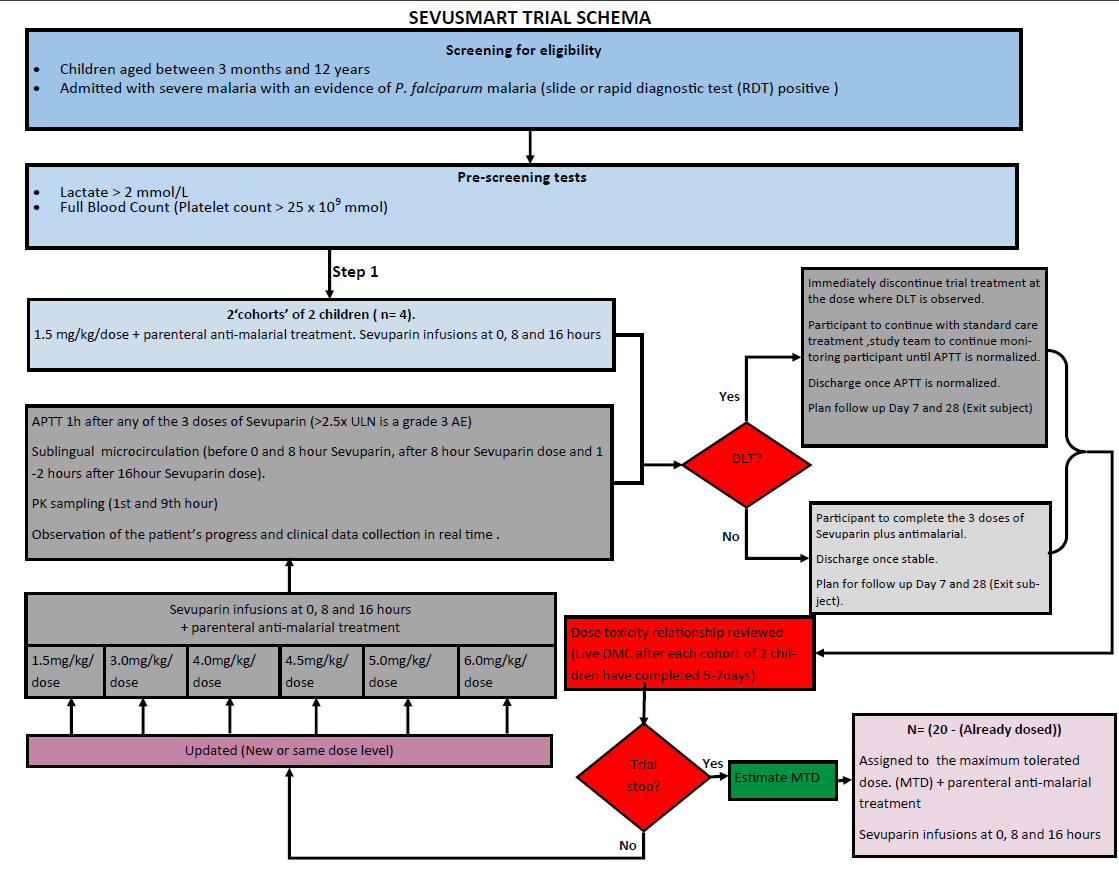


## Table S1: Baseline characteristics of all children enrolled.

| Characteristic | N=23 |
| --- | --- |
| Age (months) | 35.0 (21.0, 54.0) |
| Aged <1 years old | 3 (13.0%) |
| Gender - Female | 13 (56.5%) |
| Axillary temperature (°C) | 37.6 (36.9, 38.4) |
| Blantyre Coma Score |  |
| 1 | 4 (17.4%) |
| 2 | 8 (34.8%) |
| 3 | 7 (30.4%) |
| 4 | 3 (13.0%) |
| 5 | 1 (4.3%) |
| Two or more seizures within 24 hours | 10 (43.5%) |
| Did seizures last >30mins | 4 (40.0%) |
| Haemoglobinuria | 2 (9.1%) |
| Neck stiffness | 1 (4.3%) |
| Deep breathing | 10 (43%) |
| Haemoglobin (g/dL) | 5.5 (4.6, 6.7) |
| Haemoglobin <4g/dl | 4 (17.4%) |
| Lactate (mmols/L) | 3.6 (2.6, 6.5) |
| Glucose (mmol/L) | 6.4 (4.4, 9.7) |
| Parasite density (/µL) | 200688 (74062, 356684) |
| APTT (seconds) (N=20) | 38.5 (36.4, 43.0) |
| Already received IV antimalarials | 13 (56.5%) |
| Already received oral antimalarials | 11 (47.8%) |

## Table S2: Decisions made by the Data Monitoring Committee

| Dose (mg/kg) | Number enrolled | Number of dose limiting toxicities* | Decision |
| --- | --- | --- | --- |
| 1.5 | 4 | 0 | Escalate to 3mg/kg |
| 3 | 2 | 0 | Escalate to 4mg/kg |
| 4 | 2 | 0 | Escalate to 4.5 mg/kg |
| 4.5 | 2 | 0 | Escalate to 5mg/kg |
| 5 | 2 | 0 | Escalate to 6mg/kg |
| 6 | 2 | 2 | De-escalate to 5mg/kg |
| 5 | 2 | 2 | De-escalate to 4mg/kg |
| 4 | 2 | 2 | De-escalate to 3mg/kg |
| 3 | 2 | 0 | Enrolment completed |

*Dose limiting toxicity defined by Activated partial thromboplastin time (APTT) >2.5 times the Upper Limit of Normal (ULN)

NB: Each decision was made after considering the Continual Reassessment model’s recommendation.

## Table S3: Outcomes in all children enrolled

| Outcome | Dose level (mg/kg) | | | | | | | Total | |
| --- | --- | --- | --- | --- | --- | --- | --- | --- | --- |
|  | 1.5 | 3 | 4 | 4.5 | 5 | 6 |  | |
|  | N=7 | N=4 | N=4 | N=2 | N=4 | N=2 | N=23 | |
| Efficacy outcomes | | | | | | | | | |
| Change in lactate at 8 hrs (mmol/L) a | -1.6 (1.9) | -0.3 (2.9) | -1.8 (1.8) | -0.7 (-) | -7.1 (2.5) | -1.1 (-) | -2.1 (2.9) | |
| Change in lactate at 24 hrs (mmol/L) a | -0.4 (2.5) | -1.3 (2.2) | -1.8 (1.4) | -1.5 (-) | -7.4 (3.7) | -1.2 (-) | -1.9 (3.1) | |
| Parasite half-life (hours) (geometric mean) | -b | - b | 4.2  (N=2) | 11.1  (N=1) | 8.2  (N=1) | 5.0  (N=1) | 6.0 (3.5,10.4) c | |
| Presence of mature infected erythrocytes at 8 hours | 0 | 0 | 0 | 0 | 0 | 0 | 0 | |
| Presence of mature infected erythrocytes at 24 hours | 0 | 0 | 0 | 0 | 0 | 0 | 0 | |
| Safety outcomes | | | | | | | | | |
| Neurological sequalae at day 28 | 0 | 0 | 0 | 0 | 0 | 0 | 0 | |
| Adverse events* | | | | | | | | | |
| Deaths | 0 | 0 | 0 | 0 | 1 | 0 | 1 | |
| Non-fatal SAES by day 28 | 1 | 0 | 1 | 0 | 0 | 0 | 2 | |
| Adverse events grade 3 or 4 by day 28 | 0 | 0 | 2 | 0 | 3 | 2 | 7 | |

Note: APTT was not measured in the three children included this analysis (compared to the main analysis) and so is not presented here.

Arithmetic mean (sd) or N (%) presented unless specified otherwise. Standard deviation not shown when N<4.

a One child died prior to the 24 hour measurement of lactate (in the 5mg/kg dose). One child (in the 4.5mg/kg dose) did not have a lactate measured within the window around 8 hours.

bNot estimated as ≤2 measurements in each child

c 95% Confidence interval presented around geometric mean

*A dose limiting toxicity of APTT>2.5xULN was also a grade 3 adverse event and 2/2 events in dose level 4, 2/3 events in dose level 5 and 2/2 events in dose level 6 were dose limiting toxicities. These were deemed possibly or probably related to sevuparin. The other adverse event at the dose of 5mg/kg was a grade 3 clinical event (fever and cough), unlikely related to sevuparin. The non-fatal SAE at the dose of 4 mg/kg was a hospital readmission due to anaemia judged unlikely related to sevuparin; and at a dose of 1.5 mg/kg was a hospital readmission due to convulsions judged unlikely related to sevuparin (occurring in a child without APTT measurements so not included in the primary analysis). The death (due to complicated malaria) was also judged unlikely related to sevuparin.

## Table S4: FEAST Paediatric Emergency Triage (PET) score in primary analysis population (n=20)

| Component of score | N (%) |
| --- | --- |
| Axillary Temp ≤37°C | 15 (75%) |
| Heart rate - Normal (105-220 beats per minute) | 20 (100%) |
| Capillary refill>2 seconds | 15 (75%) |
| Conscious level |  |
| Prostration | 9 (47.4%) |
| Coma | 10 (52.6%) |
| Difficulty breathing/respiratory distress | 8 (40%) |
| Bilateral Lung Crepitations | 1 (5%) |
| Weak pulse | 5 (25%) |
| FEAST PET score |  |
| 3 | 1 (5%) |
| 5 | 4 (20%) |
| 6 | 7 (35%) |
| 7 | 8 (40%) |

## Table S5: Schedule of Assessments

|  | **Assessment Time** | | | | | | | | | | | |
| --- | --- | --- | --- | --- | --- | --- | --- | --- | --- | --- | --- | --- |
| **Procedure** | **Adm** | **1h** | **2h** | **4h** | **8h** | **9h** | **17h** | **24h** | **Bi daily to discharge** | **Day**  **7** | **Day**  **28** |
| Clinical assessment | X | X | X | X | X |  |  | X | X | X | X |
| ECG continuous to 24 hours (Kilifi) | X |  |  |  |  |  |  | X |  |  |  |
| APTT and coagulation tests (ACT) (1.7ml) | X | X  1 hr post dose |  |  |  | X  1 hr post dose | X  1 hr post dose | X |  |  |  |
| Lactate (point of care) | X | X |  |  |  | X |  | X |  |  |  |
| Standard clinical test non-research | X |  |  |  |  |  |  | X |  | X |  |
| Malaria slides | X |  |  |  |  | X |  | X | (36,48, 72 hrs) | X | X |
| Admission plasma ** | X |  |  |  |  | X |  |  |  |  | X |
| PK sample |  | X |  |  |  | X |  |  |  |  |  |
| Neuro-developmental assessment | X |  |  |  |  |  |  |  |  |  | X |

* Standard- non research clinical tests full blood count will be done at admission and at 24 hours and Day 7 (Full blood count only).

Malaria slide and morphology will be done at 0, 9, 17, 24, 36, 48 hours (and 72 hours if in hospital); at follow up (Day 7 and 28)

**For quantitative plasma HRP2 assessment,
